# Supplementary material
Source: PubMed Central journal article supplement (PMC4000086)
Supplement: embj0033-0668-sd2.pdf [file embj0033-0668-sd2.pdf]

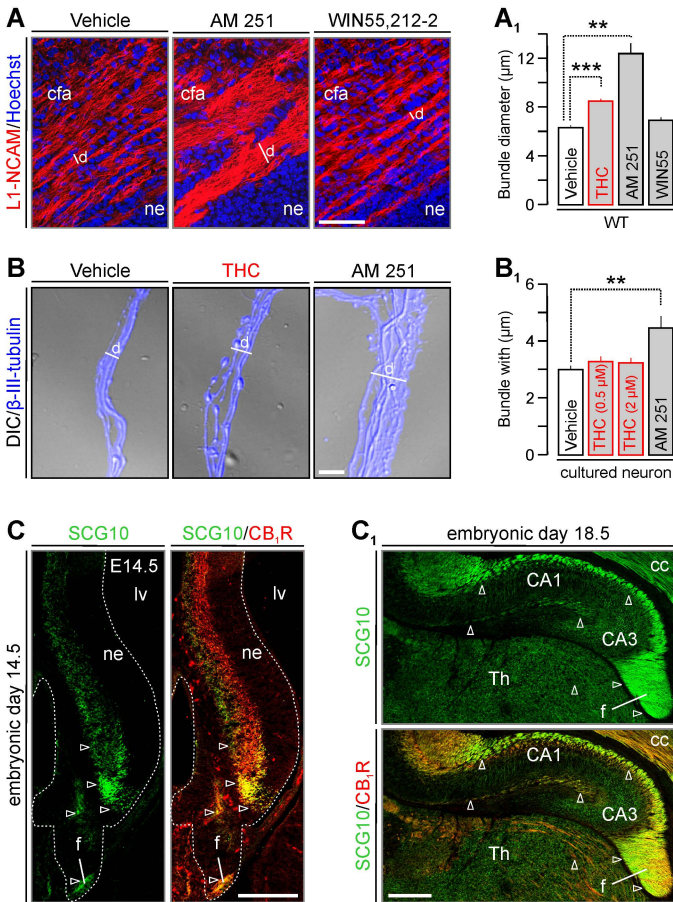

(1 column)

Fig. S2 **Pharmacological dissection of CB<sub>1</sub>R function evoking corticofugal axon bundling and SCG10 localization in hippocampus.** (A) AM 251 (5 mg/kg) and WIN55,212-2 (5 mg/kg) were administered daily from E5.5-E17.5, fetuses harvested one day later and processed (Keimpema *et al.*, 2010). Corticofugal axon fasciculation was assessed by quantitative L1-NCAM histochemistry. The cross-section thickness (“diameter” (d)) of primary fascicles was determined in  $n = 4-7$  male fetuses/group from independent pregnancies ( $> 300$  measurements/group). AM 251 but not WIN55,212-2 induced the coalescing of axons into enlarged fascicles. (A<sub>1</sub>) Quantitative morphometry including data on THC effects shown in Fig. 2A<sub>1</sub>. (B) Cortical neurons exposed to THC or AM 251 recapitulated the *in vivo* axonal phenotype when cultured in the presence of the drugs indicated for 24h. (B<sub>1</sub>) Note that AM 251 was particularly efficacious in promoting the alignment of multiple neurites ( $n = 9-13$  observations/ group from  $n > 2$  simultaneously processed samples in duplicate experiments). (C,C<sub>1</sub>) SCG10 co-localized with CB<sub>1</sub>R<sub>s</sub> in the primordial hippocampus including migrating neurons (*open arrowheads*, c) on E14.5, and axons (*open arrowheads* in e.g. fimbria (f)) on E18.5. *Abbreviations:* Supplementary Information text. Data were expressed as means  $\pm$  s.e.m.; \*\*\* $p < 0.001$ , \*\* $p < 0.01$ . *Scale bars* = 350  $\mu$ m (C,C<sub>1</sub>), 50  $\mu$ m (A), 5  $\mu$ m (B).

Keimpema E, Barabas K, Morozov YM, Tortoriello G, Torii M, Cameron G, Yanagawa Y, Watanabe M, Mackie K, and Harkany T (2010) Differential subcellular recruitment of monoacylglycerol lipase generates spatial specificity of 2-arachidonoyl glycerol signaling during axonal pathfinding. *J Neurosci* **30**: 13992-14007
