# Supplementary material
Source: PubMed Central journal article supplement (PMC4000086)
Supplement: embj0033-0668-sd3.pdf [file embj0033-0668-sd3.pdf]

**A**

| gene   | protein ID   | THC (%) |
|--------|--------------|---------|
| Sod1   | gij1226471   | - 21.2  |
| Pdha1  | gij6679261   | - 20.6  |
| Stmn2  | gij13384630  | - 17.0  |
| Nudt21 | gij13386106  | - 14.3  |
| Gpc1   | gij7710028   | - 11.0  |
| Ncan   | gij1709255   | - 10.9  |
| Fabp5  | gij6754450   | 3.9     |
| Eif4a  | gij50815     | 9.5     |
| Hnrnp1 | gij74207436  | 10.8    |
| Prr8   | gij12964610  | 11.6    |
| Anp32a | gij1763275   | 13.6    |
| Tuba8  | gij8394493   | 14.4    |
| Coro1c | gij74151603  | 14.6    |
| D1Pas1 | gij14861844  | 14.9    |
| Ddx3x  | gij6753620   | 15.3    |
| Gsk3a  | gij72384361  | 16.4    |
| Cops5  | gij7304971   | 16.6    |
| Capza2 | gij6671672   | 17.3    |
| Ap2a1  | gij6671561   | 17.6    |
| Tuba4  | gij148667971 | 17.9    |
| Ctndd1 | gij26006157  | 19.5    |
| Msn    | gij74186081  | 21.7    |
| Pfkm   | gij13529638  | 22.6    |
| Palm   | gij74193950  | 23.9    |
| Cct6a  | gij6753324   | 24.6    |
| Eef1a1 | gij26345590  | 25.0    |
| Dhx57  | gij38614392  | 34.5    |
| Bag6   | gij33147082  | 37.0    |
| Ncbp1  | gij33585617  | 37.5    |
| Commd5 | gij21313478  | 38.0    |
| Rpl4   | gij12846949  | 47.5    |
| Tcof1  | gij148677857 | 54.0    |

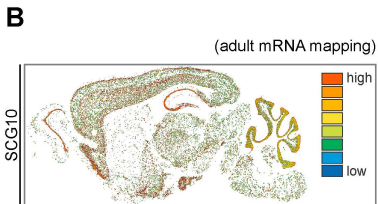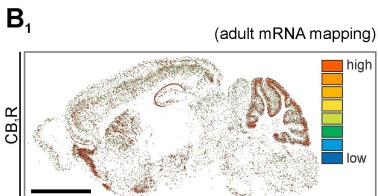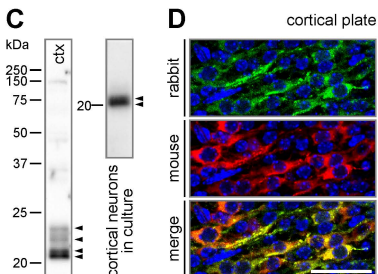

Fig. S3 **iTRAQ/MALDI-TOF profiling of the THC-sensitive proteome in the fetal mouse cerebrum.** (A) Protein identities significantly modified by THC (applied daily from E5.5-E17.5) in the cortices of *male* mouse fetuses at E18.5. Comparative analysis of  $n = 5$  (THC) and  $n = 3$  (vehicle) with data expressed as percentage deviation from the mean control value. Only statistically significant hits are shown, as evaluated by the Wilcoxon signed-rank test. Increased color tones identify data clusters in THC-exposed fetal brains with  $> \pm 15\%$  change relative to vehicle-treated controls. (B, B<sub>1</sub>) SCG10 and CB<sub>1</sub>R mRNA distribution maps available from the Allen brain atlas ([www.brain-map.org](http://www.brain-map.org)) were color coded and modified to optimally visualize olfactory, cortical, ventral pallidal and cerebellar areas harboring significant levels of either mRNA transcript. Colors from blue towards red correspond to incrementing mRNA expression levels. (C) Anti-SCG10 antibodies recognized specific protein products corresponding to the calculated molecular size of SCG10 isoforms (22-24 kDa). Note that four SCG10 isoforms were discerned on Western blots of cortical homogenates (E18.5, *left panel*). In contrast, cultured neurons only expressed 2 major isoforms of this protein (*right panel*) when probed with an anti-SCG10 polyclonal antibody raised in rabbit. (D) Simultaneous double-label immunofluorescence using two anti-SCG10 antibodies (from mouse and rabbit hosts; **Supplementary Table I**) produced identical labelling patterns in the fetal cerebral cortex. *Scale bars* = 5 mm (B<sub>1</sub>), 45  $\mu$ m (D).
