# Supplementary material
Source: PubMed Central journal article supplement (PMC4000086)
Supplement: embj0033-0668-sd4.pdf [file embj0033-0668-sd4.pdf]

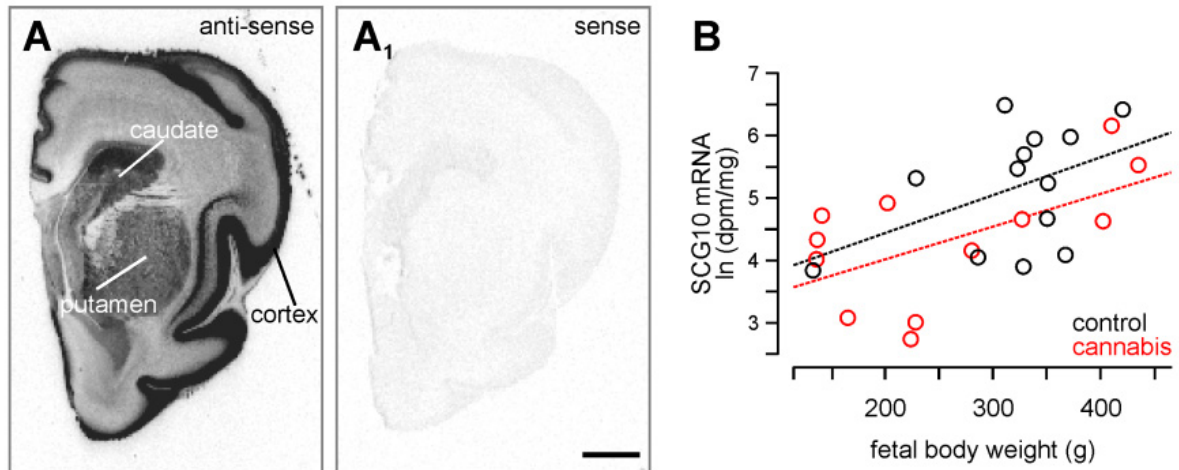

(1 column)

Fig. S4 **SCG10 mRNA expression in human fetal brain.** (A) By hybridizing an anti-sense riboprobe to coronal sections of human fetal brains from gestational weeks 18-22 (second trimester) we demonstrated prominent SCG10 mRNA expression throughout the cerebral cortex, with moderate levels in the caudate and putamen nuclei. (A<sub>1</sub>) Sense control shows the lack of non-specific mRNA hybridization signal. (B) SCG10 mRNA expression corrected for fetal body weight revealed a progressive (cannabis-independent) increase in SCG10 mRNA expression paralleling fetal growth. Dashed lines are regression plots over tissue subsets as specified. Individual data points are shown from  $n = 12$  (THC; red) and  $n = 13$  (control; black) subjects. Scale bar = 1 cm.
