# Supplementary material
Source: PubMed Central journal article supplement (PMC4000086)
Supplement: embj0033-0668-sd5.pdf [file embj0033-0668-sd5.pdf]

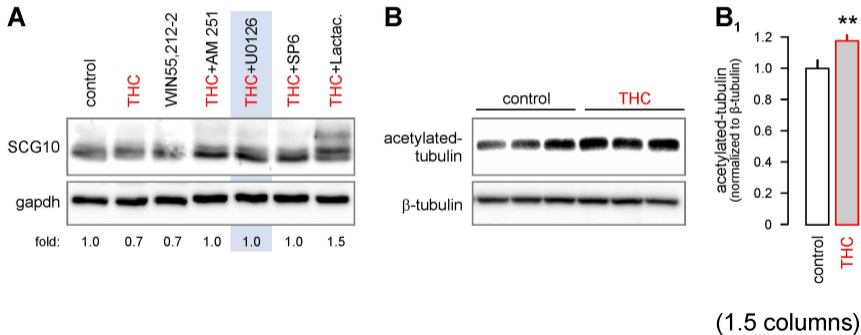

Fig. S5 **Pharmacological modulation of THC-induced SCG10 degradation.** (A) Representative Western blot showing the rescue of THC-induced SCG10 protein degradation by AM 251 (CB<sub>1</sub>R antagonist), U0126 (MEK-1/2 inhibitor, *highlighted in blue*), SP600125 (JNK inhibitor) and lactacystin (proteasome inhibitor). Data extend those shown in Fig. 5C,C<sub>1</sub>. (B) THC increases tubulin acetylation *in vitro*. Experiments were performed according to the protocols used in Fig. 5C<sub>2</sub> and Fig. 7D<sub>1</sub>. Here,  $\beta$ -III-tubulin served as loading control. For visual clarity, three samples from independent experiments were blotted in parallel and analyzed by means of densitometry. (B<sub>1</sub>) Quantitative data were expressed as means  $\pm$  s.e.m.,  $**p < 0.01$  vs. control;  $n = 6$ /group.
