# Supplementary material
Source: PubMed Central journal article supplement (PMC4000086)
Supplement: embj0033-0668-sd6.pdf [file embj0033-0668-sd6.pdf]

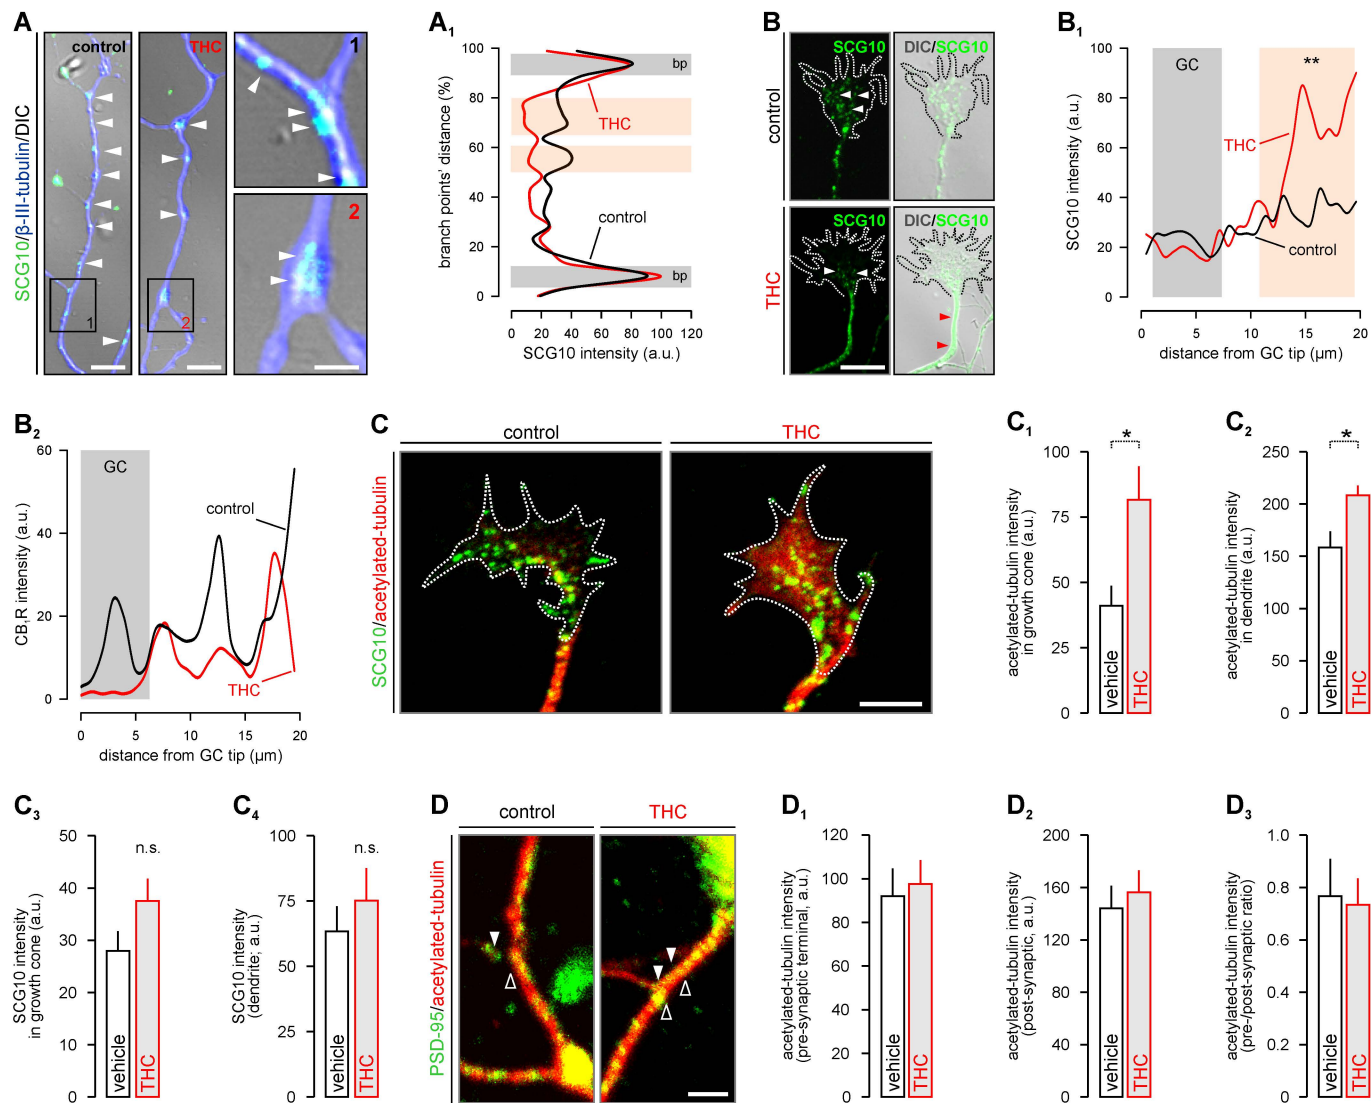

**Fig. S6 Prolonged THC treatment *in vitro* induces SCG10 redistribution in cortical neurons.** (A) THC treatment for 24h led to a preferential loss of SCG10 (*arrowheads*) from the neurite shaft, confining it to branching points (*open rectangles*) shown in insets “1” and “2” at high-resolution. (A<sub>1</sub>) Quantitative fluorescence profiling of SCG10 in neurites after THC exposure for 24h ( $n > 20$ /condition; *bp*: branching point). Orange shading identifies regions of significant difference ( $p < 0.01$ ). (B) SCG10 localization to growth cones and adjoining neurite stems after THC (2  $\mu$ M) exposure for 24h. White and red arrowheads point to the sites of SCG10 accumulation in growth cones and neurite shafts, respectively. (B<sub>1</sub>) Quantitative subcellular immunofluorescence profiling revealed that THC excludes SCG10 from the central domain of growth cones (GC, *boxed area in grey*), with preferential accumulation restricted to the distal neurite stem (*boxed area in orange*). (B<sub>2</sub>) CB<sub>1</sub>R immunofluorescence distribution in neurites of cultured cortical neurons. Note that THC tended to decrease, albeit non-significantly, CB<sub>1</sub>R levels. For clarity, mean intensity curves from  $n = 10 - 22$  neurites/condition are shown in B<sub>1</sub> and B<sub>2</sub>.  $p < 0.05$  boxed area in grey,  $p < 0.01$  (area in orange). (C) Spatial relationship of SCG10 localization with tubulin acetylation in growth cones of short secondary processes, prospective dendrites, and their growth cones. THC induced significant tubulin acetylation in both the growth cone (C<sub>1</sub>) and the “dendrite/secondary neurite” shaft (C<sub>2</sub>). In contrast, SCG10 levels remained largely unchanged (n.s., non-significant) in the processes also sampled for acetylated-tubulin content. This suggests CB<sub>1</sub>R/SCG10-independent cytoskeletal reorganization, particularly since only the axon contains cell-surface CB<sub>1</sub>Rs in neurons (McDonald *et al*, 2007). (D) Next, we sampled acetylated tubulin content in PSD95-immunoreactive dendrite domains, putative excitatory postsynaptic sites (Roloff *et al*, 2010), and apposing pre-synaptic terminals (acetylated-tubulin<sup>+</sup>/PSD95<sup>+</sup>). These data showed unchanged acetylated-tubulin content in the pre-synaptic terminal (D<sub>1</sub>) and corresponding PSD95<sup>+</sup> post-synaptic element (D<sub>2</sub>). Moreover, the ratio of pre-/post-synaptic acetylated-tubulin levels remained unaffected (D<sub>3</sub>). Data were expressed as means  $\pm$  s.e.m.,  $n > 20$  samples/group were processed in panels C<sub>1</sub>-D<sub>3</sub>. \* $p < 0.05$  (C<sub>1</sub>,C<sub>2</sub>). Scale bars = 10  $\mu$ m (control and THC in A), 4  $\mu$ m (inset “2”), 5  $\mu$ m (B,C and D).

McDonald NA, Henstridge CM, Connolly CN, and Irving AJ (2007) An essential role for constitutive endocytosis, but not activity, in the axonal targeting of the CB1 cannabinoid receptor. *Mol Pharmacol* **71**: 976-984

Roloff AM, Anderson GR, Martemyanov KA, and Thayer SA (2010) Homer 1a gates the induction mechanism for endocannabinoid-mediated synaptic plasticity. *J Neurosci* **30**: 3072-3081
