# Supplementary material
Source: PubMed Central journal article supplement (PMC4000086)
Supplement: embj0033-0668-sd7.pdf [file embj0033-0668-sd7.pdf]

Tortoriello *et al.* - Table SI  
(Revision, MS ID#: EMBOJ-2013-86035)

| <b>Marker</b>                | <b>Host</b> | <b>Western</b> | <b>IHC/ICC</b> | <b>Source</b>     |
|------------------------------|-------------|----------------|----------------|-------------------|
| Acetylated $\alpha$ -tubulin | mouse       | 1:5,000        | 1:3,000        | Sigma-Aldrich     |
| $\beta$ -III-tubulin         | mouse       |                | 1:2,000        | Promega           |
| $\beta$ -actin               | mouse       | 1:2,000        |                | Sigma-Aldrich     |
| CB <sub>1</sub> R            | goat        | 1:1,000        | 1:1,000        | M. Watanabe       |
| phospho-CB <sub>1</sub> R    | goat        | 1:250          |                | Santa Cruz        |
| CRMP-2                       | mouse       |                | 1:1,000        | IBL-AMERICA       |
| DAGL $\alpha$                | guinea pig  | 1:500          |                | K. Mackie         |
| Erk1/2                       | rabbit      | 1:800          |                | Cell Signaling    |
| phospho-Erk1/2               | rabbit      | 1:800          |                | Cell Signaling    |
| Gapdh                        | rabbit      | 1:6,000        |                | Cell Signaling    |
| GFP                          | rat         | 1:1,000        |                | Synaptic Systems  |
| L1-NCAM                      | rat         |                | 1:1,000        | Millipore         |
| MAP-2                        | mouse       |                | 1:500          | Millipore         |
| MGL                          | rabbit      | 1:1,000        |                | K. Mackie         |
| Phalloidin (F-actin)         |             |                | 1:500          | Invitrogen        |
| PSD95                        | rabbit      |                | 1:500          | Synaptic Systems  |
| SAPK/JNK                     | rabbit      | 1:1,000        |                | Cell Signaling    |
| phospho-SAPK/JNK             | rabbit      | 1:1,000        |                | Cell Signaling    |
| SCG10/stathmin-2             | rabbit      | 1:1,000        | 1:1,000        | Novus Biologicals |
| SCG10/stathmin-2             | mouse       |                | 1:1,000        | NeuroMab          |
| VACHT                        | rabbit      | 1:1,000        |                | Synaptic Systems  |
| VGAT                         | rabbit      | 1:1,000        |                | Synaptic Systems  |
| VGLUT1                       | rabbit      | 1:1,000        |                | Synaptic Systems  |

(1 column)

Table S1 **Antibodies used for Western blotting and immunofluorescence histochemistry.** Hosts, application-specific dilution, and suppliers of the antibodies deployed in this study were listed. Dr. M. Watanabe (Department of Anatomy, Hokkaido University School of Medicine, Sapporo, Japan) provided anti-CB<sub>1</sub>R antibodies (Kawamura *et al*, 2006). Anti-DAGL $\alpha$  and anti-MGL antibodies were from Dr. K. Mackie (Gill Center, Indiana University, IN, USA). Target selectivity of the SCG10 antibodies is shown in Supplementary Fig. S3D.

Kawamura Y, Fukaya M, Maejima T, Yoshida T, Miura E, Watanabe M, Ohno-Shosaku T, and Kano M (2006) The CB1 cannabinoid receptor is the major cannabinoid receptor at excitatory presynaptic sites in the hippocampus and cerebellum. *J Neurosci* **26**: 2991-3001
