# Supplementary material
Source: PubMed Central journal article supplement (PMC4000086)
Supplement: embj0033-0668-sd8.pdf [file embj0033-0668-sd8.pdf]

**A**

| GenBank number | Protein           | Primer pair                                                   | Localization     |
|----------------|-------------------|---------------------------------------------------------------|------------------|
| NM_025285      | SCG10             | 5'-GCAATGGCCTACAAGGAAAA-3'<br>5'-GGTGGCTTCAAGATCAGCTC-3'      | exon1/2<br>exon3 |
| NM_007726      | CB <sub>1</sub> R | 5'-TCTTAGACGGCCTTGCAGAT-3'<br>5'-AGGGACTACCCCTGAAGGAA-3'      | exon2<br>exon2   |
| NM_008084      | GAPDH             | 5'-AACTTTGGCATTGTGGAAGG-3'<br>5'-ACACATTGGGGGTAGGAACA-3'      | exon4<br>exon5   |
| NM_013684      | TBP               | 5'-ACCCTTCACCAATGACTCCTATG-3'<br>5'-ATGACTGCAGCAAATCGCTTGG-3' | exon3<br>exon5   |

**B**

| SMARTpool | target sequence     |
|-----------|---------------------|
| siRNA (1) | ACAUAAUGCUACUGAACGU |
| siRNA (2) | AGUCAGGGUAGAAGCGAAA |
| siRNA (3) | UAUAAUGGAUCAUGCGAUA |
| siRNA (4) | CCUCAUGGAUUACGCGCUA |

**C**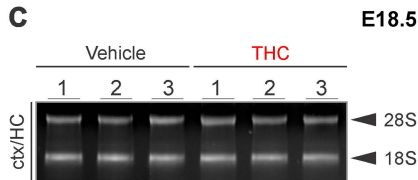**C<sub>1</sub>**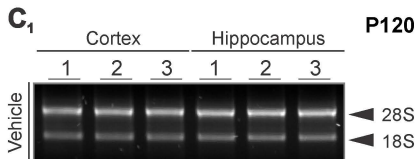**C<sub>2</sub>**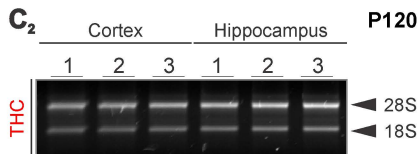

(1.5 columns)

Table SII **Primer sequences, siRNA targets and RNA quality controls.** (A) Quantitative real-time PCR reactions were performed with primer pairs amplifying short fragments for each gene. Primer pairs were designed to efficiently anneal to their target sequence on mouse cDNAs. (B) A pool of ON-TARGETplus SMART siRNAs were used (Thermo Scientific), with target sequences of the individual siRNA components shown. (C-C<sub>2</sub>) The integrity of RNA used for gene expression profiling was tested by running total RNA (0.5 µg) from microdissected embryonic (E18.5; C) or adult (P120; C<sub>1</sub>,C<sub>2</sub>) mouse cortices and hippocampi on 1.0% agarose gels pre-loaded with GelRed (Biotium) (Keimpema *et al*, 2010). Sharply segregated 28S and 18S rRNA bands indicated intact total RNA. Three samples (1-3) per group were run in parallel.
