# Supplementary material
Source: PubMed Central journal article supplement (PMC4000086)
Supplement: embj0033-0668-sd9.pdf [file embj0033-0668-sd9.pdf]

## LIST OF ABBREVIATIONS

|                   |                                                      |
|-------------------|------------------------------------------------------|
| 3V                | third ventricle                                      |
| Ace-tubulin       | acetylated-tubulin                                   |
| bp                | branching point (of a neurite)                       |
| BCA               | bicinchoninic acid                                   |
| CA1-CA3           | Cornu Ammonis subfields 1-3 of the hippocampus       |
| CB <sub>1</sub> R | type 1 cannabinoid receptor                          |
| cc                | corpus callosum                                      |
| cfa               | corticofugal axon                                    |
| cp                | cortical plate                                       |
| CRMP-2            | collapsin-response mediator protein 2                |
| cta               | corticothalamic axon                                 |
| ctx               | cortex                                               |
| d                 | diameter (of axon fascicle)                          |
| DAGL              | <i>sn</i> -1-diacylglycerol lipase                   |
| DG                | dentate gyrus                                        |
| DIC               | differential interference contrast                   |
| DIV               | day(s) <i>in vitro</i>                               |
| E                 | embryonic day                                        |
| Erk1/2            | extracellular signal-activated kinase 1/2 isoforms   |
| f                 | hippocampal fimbria                                  |
| fEPSP             | field excitatory postsynaptic potential              |
| gapdh             | glyceraldehyde 3-phosphate dehydrogenase             |
| GC                | growth cone                                          |
| GCP               | growth cone particle                                 |
| ge                | ganglionic eminence                                  |
| HC                | hippocampus                                          |
| IB                | immunoblotting                                       |
| IDA               | information dependent acquisition                    |
| iz                | intermediate zone                                    |
| JNK               | c-Jun N-terminal kinase                              |
| L                 | cortical layer (I-VI)                                |
| LI-IV             | cortical layers 1-4                                  |
| L1-NCAM           | L1 neural cell adhesion molecule                     |
| LTD               | long-term depression                                 |
| lv                | lateral ventricle                                    |
| MAP2              | microtubule associated protein-2                     |
| MGL               | monoacylglycerol lipase                              |
| ne                | neuroepithelium                                      |
| P                 | postnatal day                                        |
| PFA-PB            | paraformaldehyde diluted in 0.1M Na-phosphate buffer |
| pia               | pia mater                                            |

|           |                                                          |
|-----------|----------------------------------------------------------|
| PPR       | paired-pulse ratio                                       |
| s         | neuronal somata                                          |
| SCG10     | superior cervical ganglion 10/neuron-specific stathmin-2 |
| SCG10-DD  | EGFP-tagged SCG10 <sup>S62D/S73D</sup>                   |
| str.      | stratum (hippocampal layer)                              |
| str. pyr. | stratum pyramidale                                       |
| TFA       | trifluoroacetic acid                                     |
| Th        | thalamus                                                 |
| THC       | $\Delta^9$ -tetrahydrocannabinol                         |
| TUJ1      | $\beta$ -III-tubulin                                     |
| VACht     | vesicular acetylcholine transporter                      |
| VAMP2     | vesicle-associated membrane protein 2                    |
| VGAT      | vesicular GABA transporter                               |
| VGLUT1    | vesicular glutamate transporter 1                        |
| WT        | wild-type/endogenous                                     |

#### CHEMICAL NAME OF COMPOUNDS/INHIBITORS

|             |                                                                                                                                                                       |
|-------------|-----------------------------------------------------------------------------------------------------------------------------------------------------------------------|
| AM 251      | <i>N</i> -(Piperidin-1-yl)-5-(4-iodophenyl)-1-(2,4-dichlorophenyl)-4-methyl-1H-pyrazole-3-carboxamide                                                                 |
| Lactacystin | (2 <i>R</i> ,3 <i>S</i> ,4 <i>R</i> )-3-Hydroxy-2-[(1 <i>S</i> )-1-hydroxy-2-methylpropyl]-4-methyl-5-oxo-2-pyrrolidinecarboxy- <i>N</i> -acetyl-L-cysteine thioester |
| SP600125    | Anthra[1-9- <i>cd</i> ]pyrazol-6(2 <i>H</i> )-one                                                                                                                     |
| U0126       | 1,4-Diamino-2,3-dicyano-1,4- <i>bis</i> [2-aminophenylthio]butadiene                                                                                                  |
| THC         | (6 <i>aR</i> ,10 <i>aR</i> )-6,6,9-Trimethyl-3-pentyl-6 <i>a</i> ,7,8,10 <i>a</i> -tetrahydro-6 <i>H</i> -benzo[ <i>c</i> ]chromen-1-ol                               |
| WIN55,212-2 | ( <i>R</i> )-(+)-[2,3-Dihydro-5-methyl-3-(4-morpholinylmethyl)pyrrolo[1,2,3- <i>de</i> ]-1,4-benzoxazin-6-yl]-1-naphthalenylmethanone mesylate                        |
