# Supplementary material
Source: PubMed Central journal article supplement (PMC4000086)

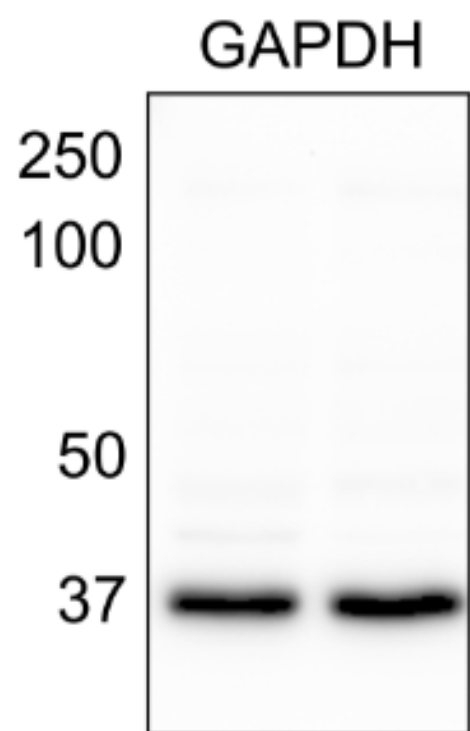

Fig. 1F,3B,5C,  
7C,S1G<sub>1</sub>

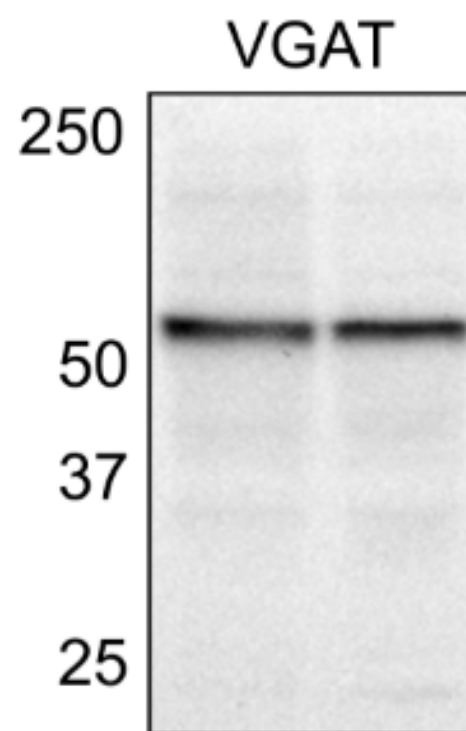

Fig. 1F

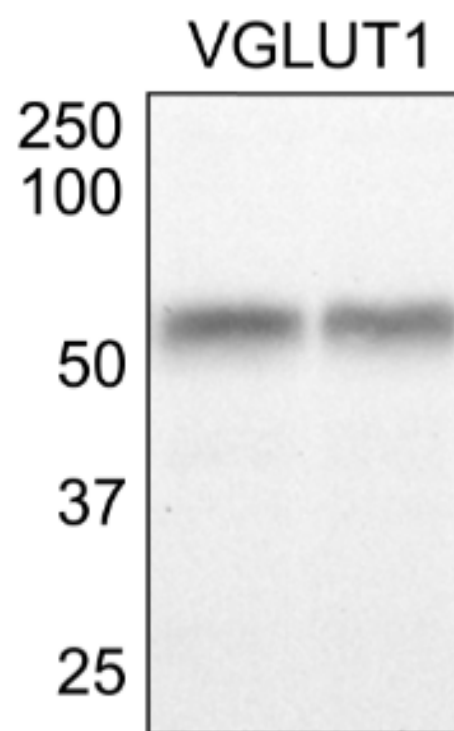

Fig. 1F

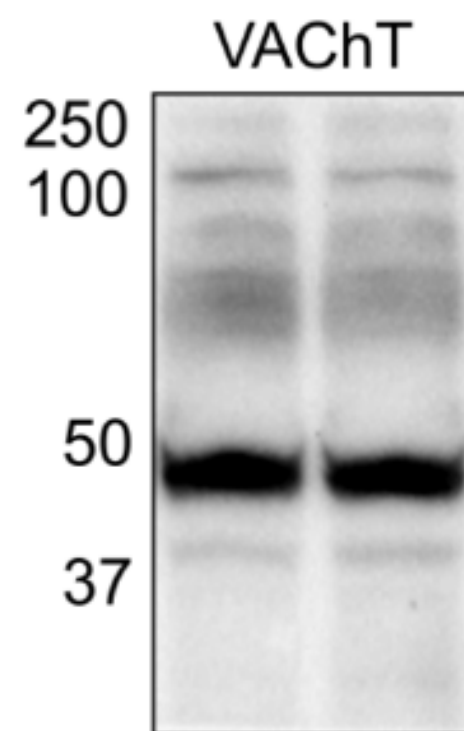

Fig. 1F

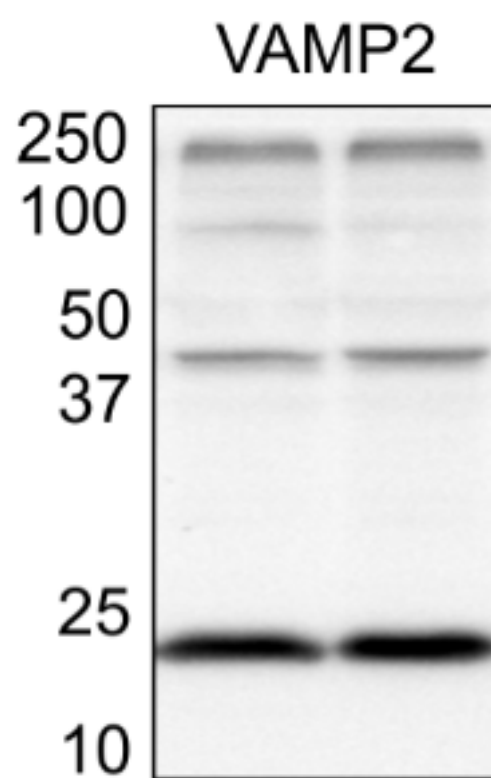

Fig. 1F

Supplement: embj0033-0668-sd11.pdf [file embj0033-0668-sd11.pdf]

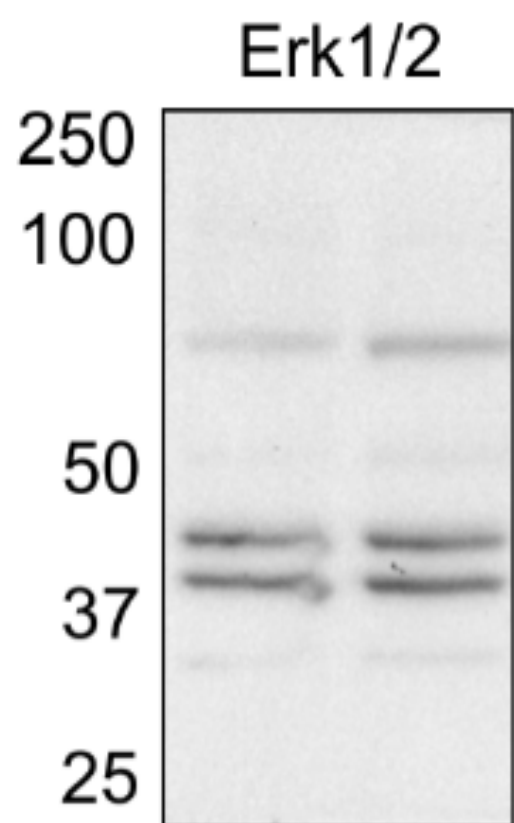

Fig. 2D,5B

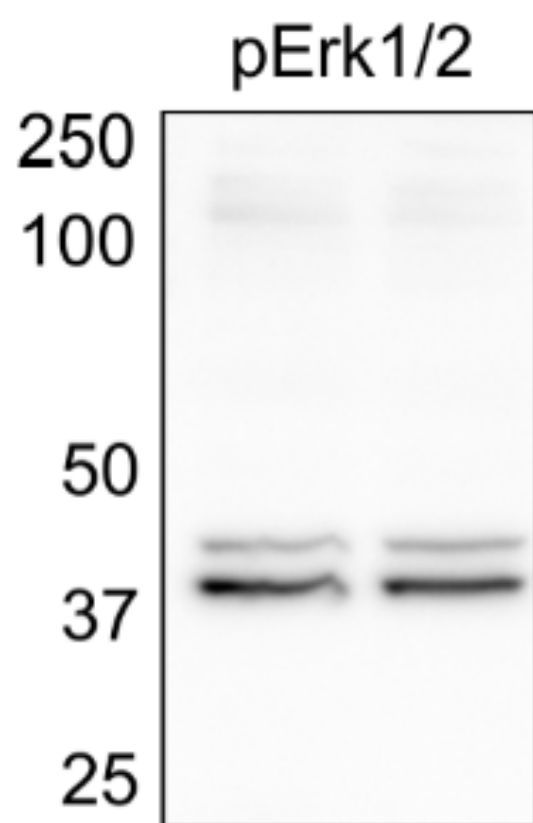

Fig. 2D,5B

Supplement: embj0033-0668-sd12.pdf [file embj0033-0668-sd12.pdf]

JNK

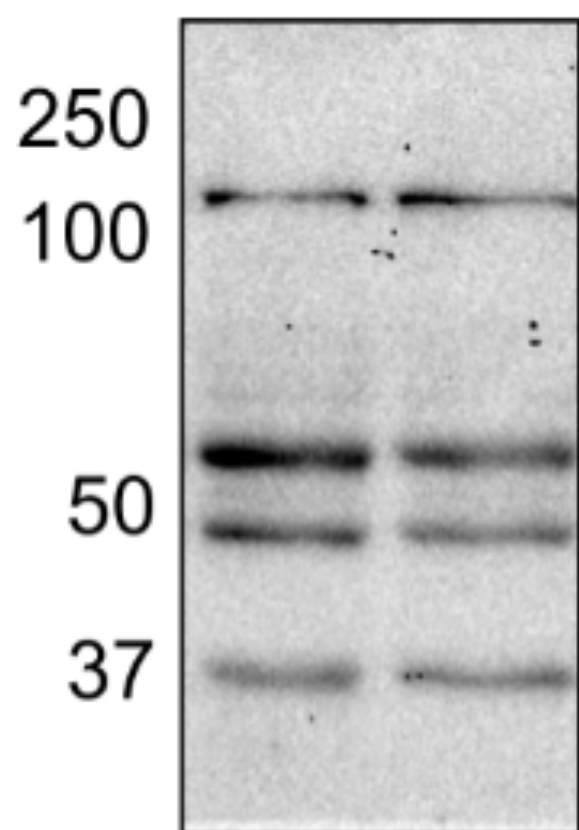

Fig. 5B

pJNK

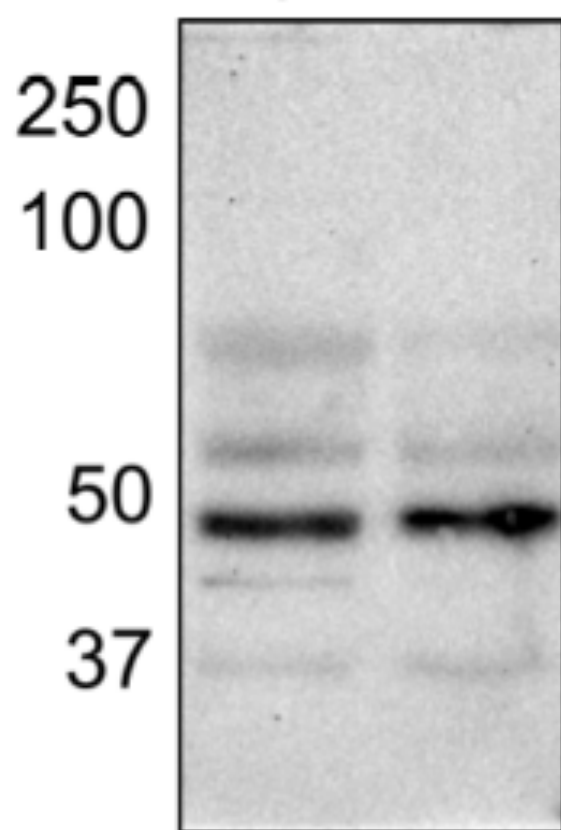

Fig. 5B,5D

acetyl.  
tubulin

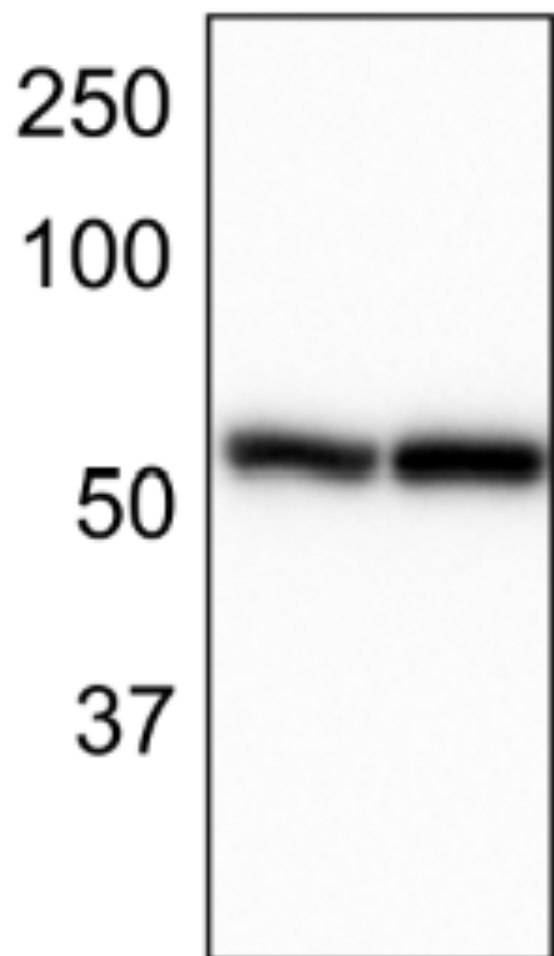

Fig. 5C<sub>2</sub>,  
S5B

beta-III  
tubulin

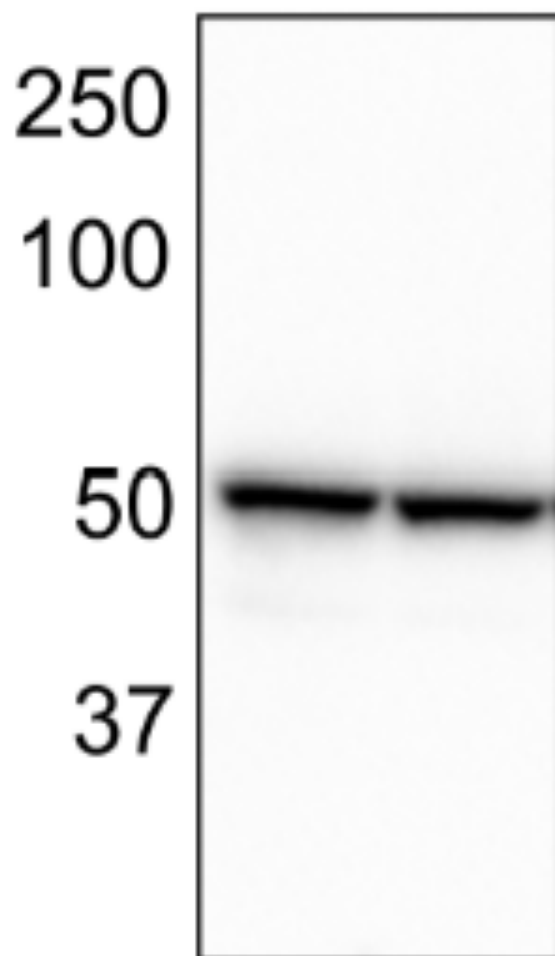

Fig. S5B

Supplement: embj0033-0668-sd13.pdf [file embj0033-0668-sd13.pdf]
